# Supplementary material for: Balancing ecosystem services with energy and food security – Assessing trade-offs from reservoir operation and irrigation investments in Kenya's Tana Basin
Source: Copernicus journal article supplement (doi:10.5194/hess-18-3259-2014), 2014-08-28
Supplement: Supplementary file 1 [file supplement-cover-letter.pdf › supplement-cover-letter.pdf]

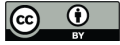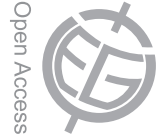

## *Supplement of*

# **Balancing ecosystem services with energy and food security – Assessing trade-offs from reservoir operation and irrigation investments in Kenya's Tana Basin**

**A. P. Hurford and J. J. Harou**

*Correspondence to:* J. J. Harou ([julien.harou@manchester.ac.uk](mailto:julien.harou@manchester.ac.uk))

- Supplement-Cover-Letter.pdf
- Fig3a\_3D\_animation.gif
- Fig7\_3D\_animation.gif
- Fig9a\_3D\_animation.gif
